# Supplementary material for: Sulfadiazine degradation via peroxydisulfate activation: insights into B/S co-doped biochar and the role of singlet oxygen
Source: Royal Society of Chemistry journal article supplement (doi:10.1039/d5ew01099c), 2026-01-01
Supplement: d5ew01099c1.pdf [file d5ew01099c1.pdf]

# **Sulfadiazine Degradation via Peroxydisulfate Activation: Insights into Boron and Sulfur Co-Doped Biochar and the Role of Singlet Oxygen**

Yanyan Nie <sup>1</sup>, Nan Xiong <sup>1</sup>, ChunJin Yao <sup>1</sup>, Zejun Zhang <sup>2,3</sup>, Yuqing Yao <sup>2,3</sup>, Xiaoling Wu <sup>2</sup>, Bo  
Sun <sup>2</sup>, Yu Qiang <sup>4</sup>, Jian He <sup>1,\*</sup> and Long Yan <sup>2,\*</sup>

<sup>1</sup> Department of Environmental Science and Engineering, Fudan University, Shanghai 200438,  
China

<sup>2</sup> Shanghai Institute of Applied Physics, Chinese Academy of Sciences, Shanghai 201800, China

<sup>3</sup> University of Chinese Academy of Sciences, Beijing 100049, China

<sup>4</sup> School of Physical and Technology, Guangxi Normal University, Guangxi 541004, China

\* Correspondence: <sup>1,\*</sup> [hejian@fudan.edu.cn](mailto:hejian@fudan.edu.cn); <sup>2,\*</sup> [yanlong@sinap.ac.cn](mailto:yanlong@sinap.ac.cn).

## Texts

### Text S1 Chemicals

Boric acid ( $\text{H}_3\text{BO}_3$ , AR), thiourea ( $\text{CH}_3\text{N}_2\text{S}$ , AR), potassium persulfate ( $\text{K}_2\text{S}_2\text{O}_8$ , AR), sulfadiazine (SDZ,  $\text{C}_{10}\text{H}_{10}\text{N}_4\text{O}_2\text{S}$ , 98%), methanol ( $\text{CH}_3\text{OH}$ , HPLC), tert-butanol ( $\text{C}_4\text{H}_{10}\text{O}$ , AR), furfuryl alcohol ( $\text{C}_5\text{H}_6\text{O}_2$ , AR), p-benzoquinone ( $\text{C}_6\text{H}_4\text{O}_2$ , AR), hydrochloric acid ( $\text{HCl}$ , 36%~38%), sodium hydroxide ( $\text{NaOH}$ , AR), sodium chloride ( $\text{NaCl}$ , AR), sodium dihydrogen phosphate ( $\text{NaH}_2\text{PO}_4$ , AR), sodium bicarbonate ( $\text{NaHCO}_3$ , AR), humic acid (HA, AR), methyl orange (MO,  $\text{C}_{14}\text{H}_{14}\text{N}_3\text{NaO}_3\text{S}$ , Ind), rhodamine B (RhB,  $\text{C}_{28}\text{H}_{31}\text{ClN}_2\text{O}_3$ , AR), oxytetracycline (OTC,  $\text{C}_{22}\text{H}_{24}\text{N}_2\text{O}_9$ , >98%), bisphenol A (BPA,  $\text{C}_{15}\text{H}_{16}\text{O}_2$ , >99.5%), and phenol ( $\text{C}_6\text{H}_6\text{O}$ , AR) were purchased from Sinopharm Chemical Reagent Co., Ltd., China. Absolute ethanol ( $\text{C}_2\text{H}_6\text{O}$ , AR) was obtained from Shanghai Aladdin Biochemical Technology Co., Ltd., China.

### Text S2 Calculation of XRD-related parameters

The average interlayer spacing ( $d_{002}$ ) of graphene-like nanosheets in the biochar samples was estimated based on Bragg's equation, where  $\lambda$  is the X-ray wavelength (0.154 nm) and  $\theta_{002}$  represents the diffraction angle corresponding to the (002) reflection.

$$d = \frac{\lambda}{2\sin\theta_{002}}$$

### Text S3 Tests of organic pollutants

Organic pollutants were quantified using UV–visible spectrophotometry at specific wavelengths: 463 nm for methyl orange (MO), 544 nm for rhodamine B (RhB), and 270 nm for phenol. Sulfadiazine (SDZ), oxytetracycline (OTC), and bisphenol A (BPA)

were analyzed by ultra-performance liquid chromatography coupled with UPLC–MS under the following conditions:

| Compound | Mobile Phase                             | Ionization Mode | Precursor Ion (m/z) | Product Ions (m/z) |
|----------|------------------------------------------|-----------------|---------------------|--------------------|
| SDZ      | Acetonitrile : 0.1% formic acid in water | ESI+            | 251.1               | <b>156/108</b>     |
| OTC      | Acetonitrile : 0.1% formic acid in water | ESI+            | 461.4               | <b>443/426</b>     |
| BPA      | Methanol : water                         | ESI-            | 227.1               | <b>211/133</b>     |

#### Text S4 $\text{pH}_{\text{pzc}}$

The point of zero charge ( $\text{pH}_{\text{pzc}}$ ) of the catalyst was determined using the pH drift method. Briefly, 50 mL of 0.1 M  $\text{NaNO}_3$  solution was adjusted to initial pH values of 3, 5, 7, 9, and 11 using 0.1 M HCl or NaOH. The solutions were purged with  $\text{N}_2$  for 10 min to remove dissolved  $\text{CO}_2$ , followed by the addition of 50 mg of biochar to each flask. The sealed suspensions were then shaken in a thermostatic incubator at 25 °C and 150 rpm for 24 h to reach equilibrium. Final pH values ( $\text{pH}_f$ ) were recorded and plotted against the initial pH ( $\text{pH}_i$ ). The point at which the  $\Delta\text{pH}$  ( $\text{pH}_i - \text{pH}_f$ ) crossed zero was identified as the  $\text{pH}_{\text{PZC}}$ .

#### Text S5 The Water Parameters of Different Water Matrices

|                          | Tap Water                                 | Lake Water                                |
|--------------------------|-------------------------------------------|-------------------------------------------|
| Temperature              | 18~20°C                                   | 15~18 °C                                  |
| pH                       | 8.01~8.32                                 | 7.35~7.90                                 |
| TOC                      | 2.28~2.92 $\text{mg}\cdot\text{L}^{-1}$   | 7.32~9.20 $\text{mg}\cdot\text{L}^{-1}$   |
| $\text{COD}_{\text{Mn}}$ | 1.28~1.72 $\text{mg}\cdot\text{L}^{-1}$   | 3.75~4.90 $\text{mg}\cdot\text{L}^{-1}$   |
| TDS                      | 189.2~207.7 $\text{mg}\cdot\text{L}^{-1}$ | 302.1~376.4 $\text{mg}\cdot\text{L}^{-1}$ |

## Text S6 Estimation of Reactive Species Contributions

The relative contributions of different reactive species involved in SDZ degradation were estimated based on the kinetic suppression induced by specific scavengers, following a method reported in previous studies<sup>1</sup>. The apparent pseudo-first-order rate constants were calculated from the initial stage of the reaction under different quenching conditions. The descending kinetic efficiencies ( $\beta$ ) of individual reactive species were defined as:

$$\beta_{\cdot OH} = k_{\cdot OH} / k \approx (k - k_{TBA}) / k$$

$$\beta_{SO_4^{\cdot -}} = k_{SO_4^{\cdot -}} / k \approx (k - k_{MeOH}) / k - (k - k_{TBA}) / k$$

$$\beta_{^1O_2} = k_{^1O_2} / k \approx (k - k_{FFA}) / k$$

$$\beta_{O_2^{\cdot -}} = k_{O_2^{\cdot -}} / k \approx (k - k_{p-BQ}) / k$$

where  $k$  is the apparent pseudo-first-order rate constant obtained without adding any scavenger, while  $k_{TBA}$ 、 $k_{MeOH}$ 、 $k_{FFA}$  and  $k_{p-BQ}$  are the apparent rate constants measured in the presence of TBA、MeOH、FFA and p-BQ, respectively.

Based on the descending kinetic efficiencies, the relative contributions ( $\gamma$ ) of different reactive species were estimated using the following equations:

$$\gamma_{\cdot OH} = \beta_{\cdot OH} / (\beta_{\cdot OH} + \beta_{SO_4^{\cdot -}} + \beta_{O_2^{\cdot -}} + \beta_{^1O_2})$$

$$\gamma_{SO_4^{\cdot -}} = \beta_{SO_4^{\cdot -}} / (\beta_{\cdot OH} + \beta_{SO_4^{\cdot -}} + \beta_{O_2^{\cdot -}} + \beta_{^1O_2})$$

$$\gamma_{^1O_2} = \beta_{^1O_2} / (\beta_{\cdot OH} + \beta_{SO_4^{\cdot -}} + \beta_{O_2^{\cdot -}} + \beta_{^1O_2})$$

$$\gamma_{O_2^{\cdot -}} = \beta_{O_2^{\cdot -}} / (\beta_{\cdot OH} + \beta_{SO_4^{\cdot -}} + \beta_{O_2^{\cdot -}} + \beta_{^1O_2})$$

where  $\gamma$  represents the estimated relative contribution of each reactive species to SDZ degradation.

### **Text S7 EPR**

A 30  $\mu\text{L}$  aliquot of the reaction solution was mixed with 30  $\mu\text{L}$  of 100 mM DMPO (prepared in ultrapure water) as a spin-trapping agent for hydroxyl and sulfate radicals. After thorough homogenization, an appropriate volume of the mixture was drawn into a capillary, which was then placed into a quartz tube and inserted into the EPR resonator cavity for signal acquisition. For singlet oxygen detection, 30  $\mu\text{L}$  of the reaction sample was mixed with 50  $\mu\text{L}$  of 100 mM TEMP, gently vortexed, and similarly loaded into a capillary. The capillary was then inserted into a quartz tube and placed in the EPR sample cavity for  $^1\text{O}_2$  measurement. The measurement parameters were set as follows: a center field of 3500 G with a sweep width of 100 G, a microwave frequency of 9.82 GHz, and a microwave power of 6.325 mW. The modulation frequency and modulation amplitude were maintained at 100 kHz and 1.0 G, respectively. Each spectrum was recorded with a sweep time of 30.0 s.

### **Text S8 Boron leaching**

After 60 min of reaction, an aliquot of the reaction mixture was transferred into a digestion vessel, acidified with concentrated  $\text{HNO}_3$ , and subjected to microwave-assisted digestion for 30 min. The digested solution was then filtered through a 0.45  $\mu\text{m}$  aqueous-phase membrane and analysed for boron content using ICP-MS (Agilent 7700).

## Figures

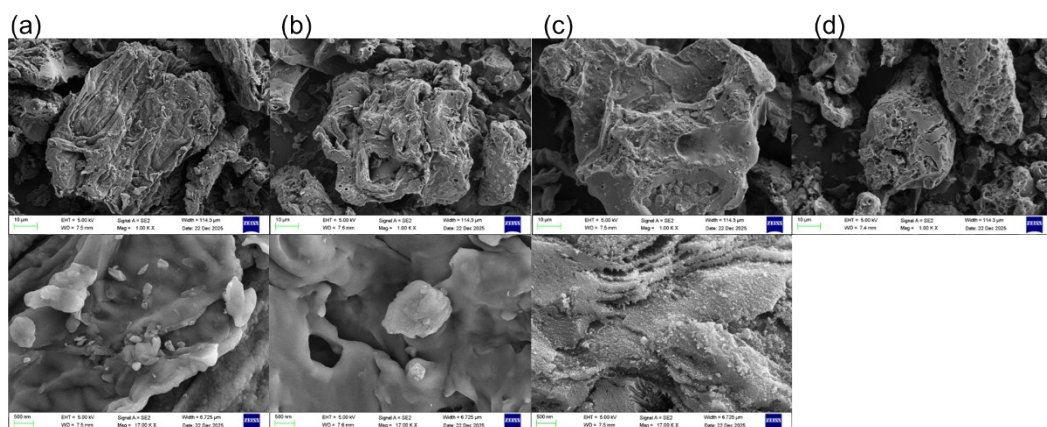

**Fig. S1.** SEM images of different biochar catalysts: (a) BC, (b) BBC, (c) SBC, (d) BS4C.

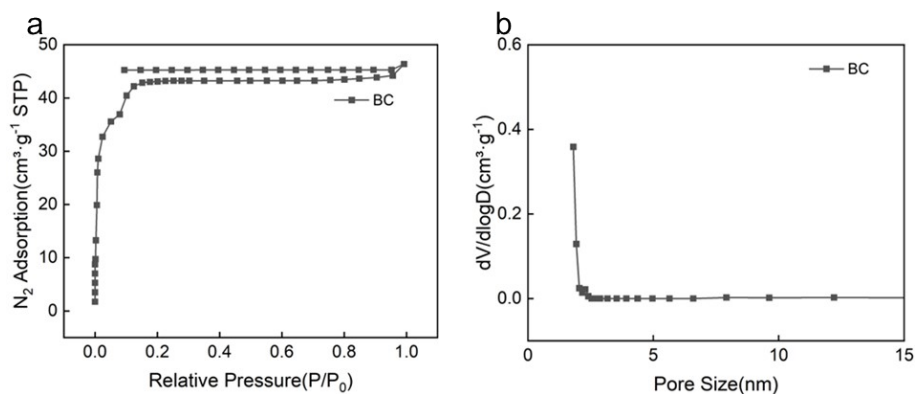

**Fig.S2.** (a)  $N_2$  adsorption–desorption isotherms and (b) pore size distribution of BC

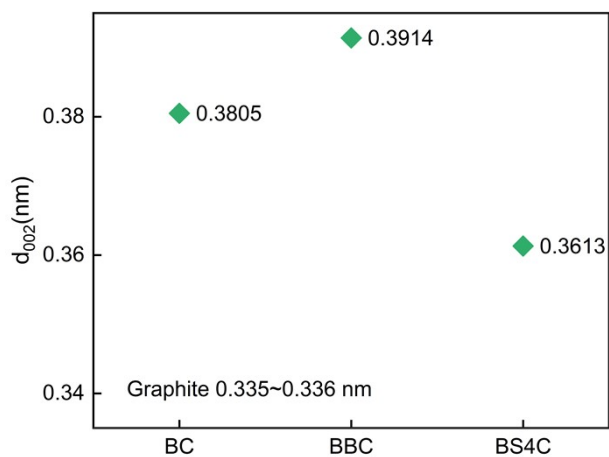

**Fig. S3.** The average interlayer spacing  $d_{002}$  of biochar samples

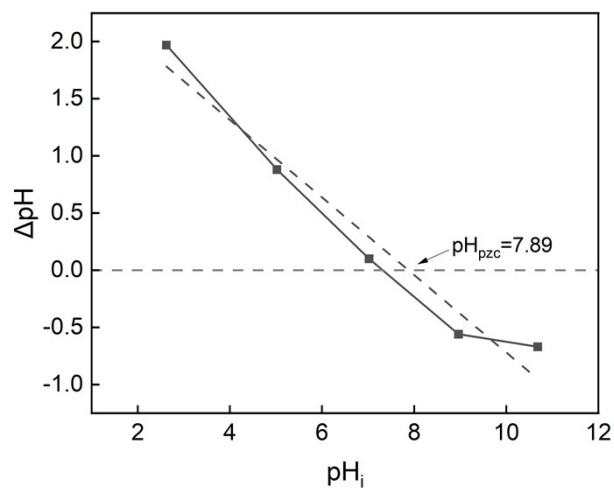

**Fig. S4.**  $\text{pH}_{\text{pzc}}$  of BS4C.

**Fig. S5.** Mass spectrometer (MS) spectra of SDZ degradation intermediates in the BS4C/PDS system.

1 #1255 RT: 1.95 AV: 1 NL: 1.31E8  
T: FTMS + p ESI Full ms [50.0000-500.0000]

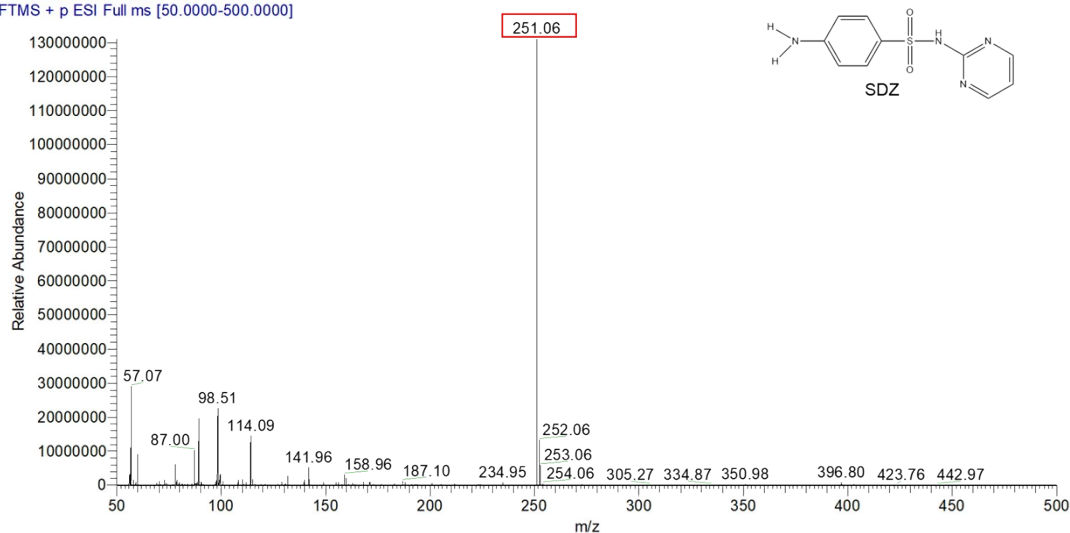

1 #1005 RT: 1.57 AV: 1 NL: 4.87E7  
T: FTMS + p ESI Full ms [50.0000-500.0000]

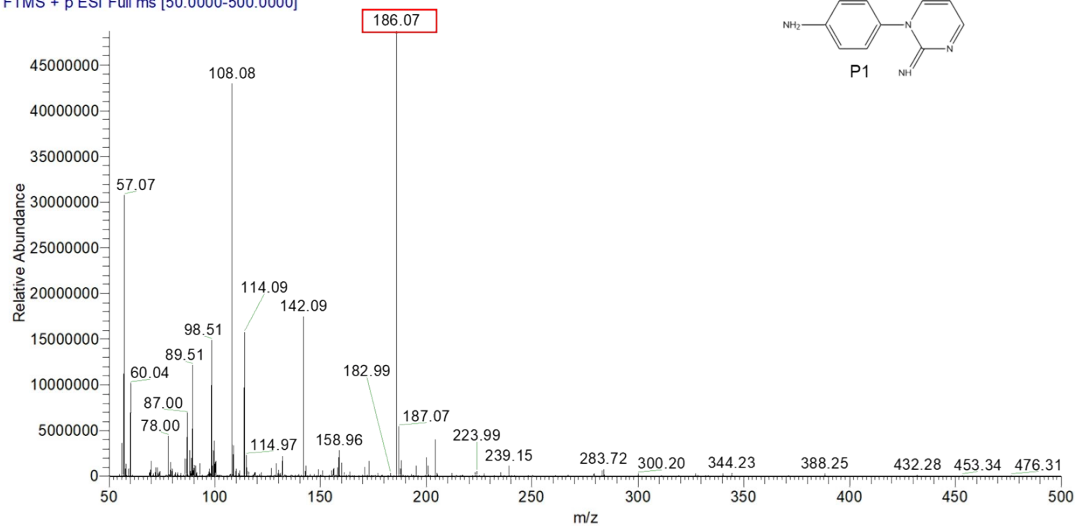

1 #6465 RT: 10.05 AV: 1 SB: 37 9.93-10.21 NL: 8.07E6  
T: FTMS + p ESI Full ms [50.0000-500.0000]

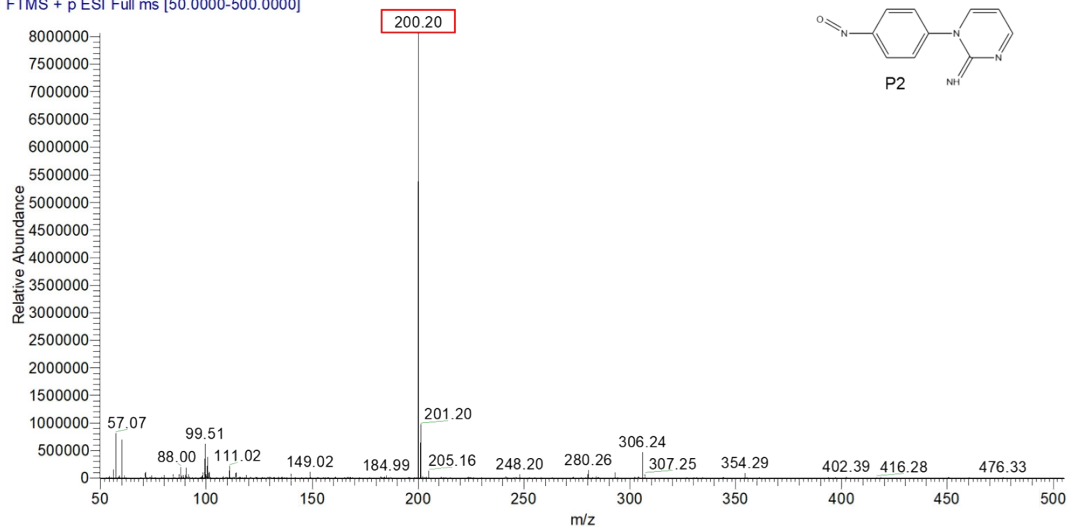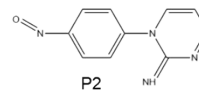

1 #835 RT: 1.30 AV: 1 SB: 49 1.23-1.43 , 0.80-0.98 NL: 1.59E7  
T: FTMS + p ESI Full ms [50.0000-500.0000]

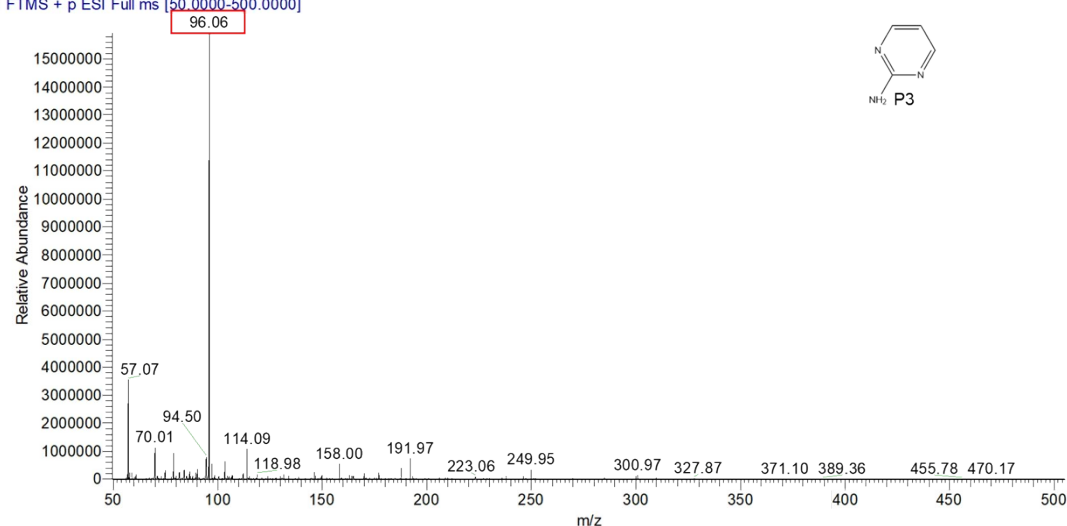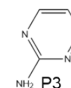

1 #5550 RT: 8.63 AV: 1 SB: 91 1.30-1.61 , 2.87-3.26 NL: 2.23E7  
T: FTMS + p ESI Full ms [50.0000-500.0000]

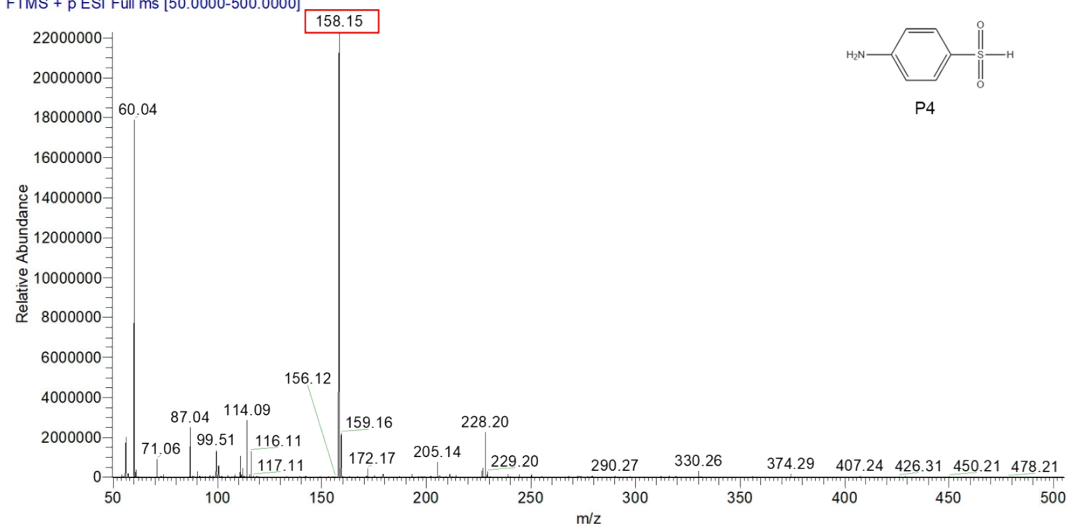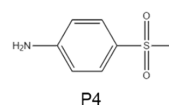



1 #1060 RT: 1.65 AV: 1 NL: 3.96E7  
T: FTMS + p ESI Full ms [50.0000-500.0000]

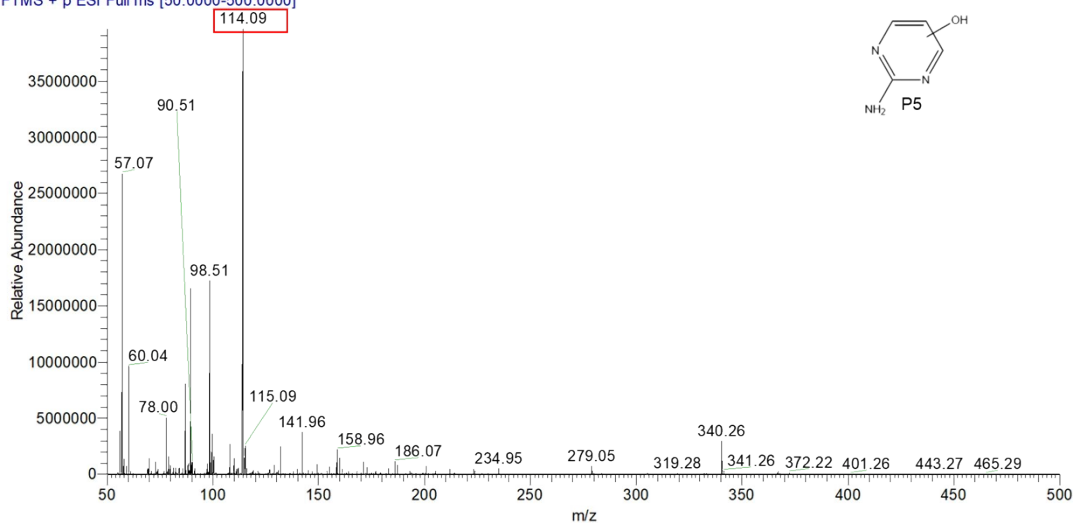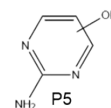

1 #7785 RT: 12.09 AV: 1 SB: 20 12.04-12.19 NL: 5.63E6  
T: FTMS + p ESI Full ms [50.0000-500.0000]

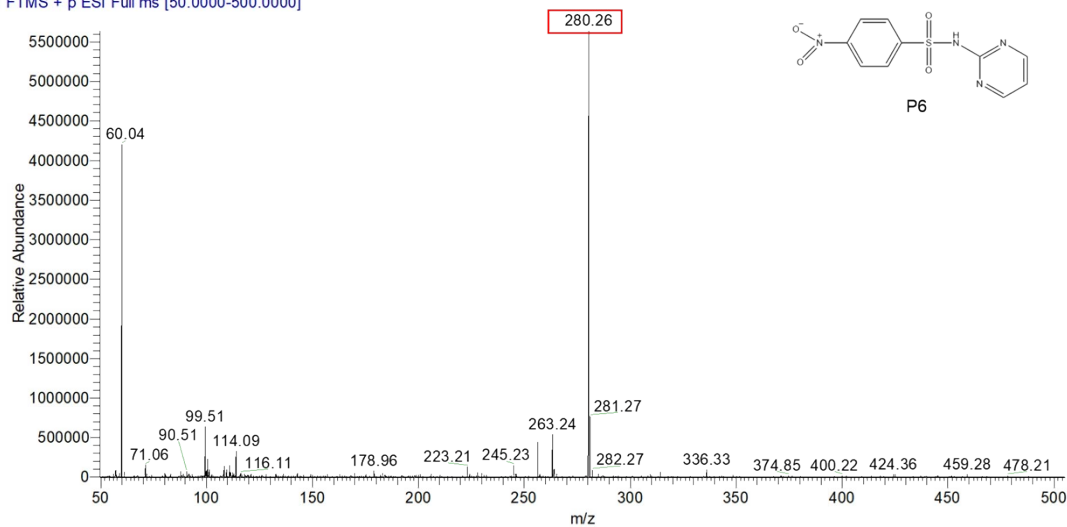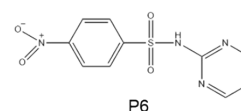

1 #5015 RT: 7.79 AV: 1 SB: 127 7.55-8.17, 6.93-7.28 NL: 2.37E6  
T: FTMS + p ESI Full ms [50.0000-500.0000]

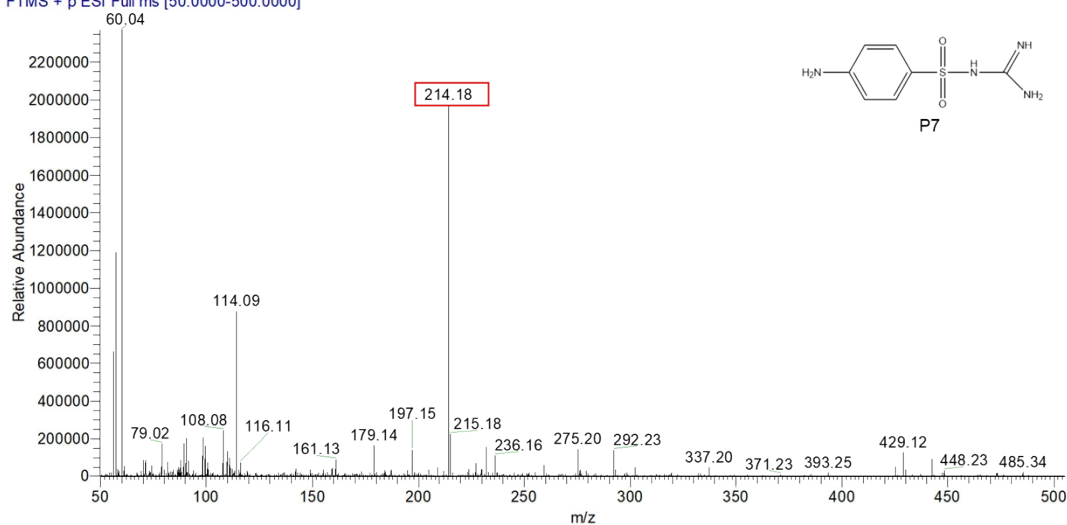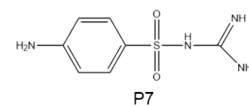

1 #4875 RT: 7.57 P: + NL: 2.54E7  
T: FTMS + p ESI Full ms [50.0000-500.0000]

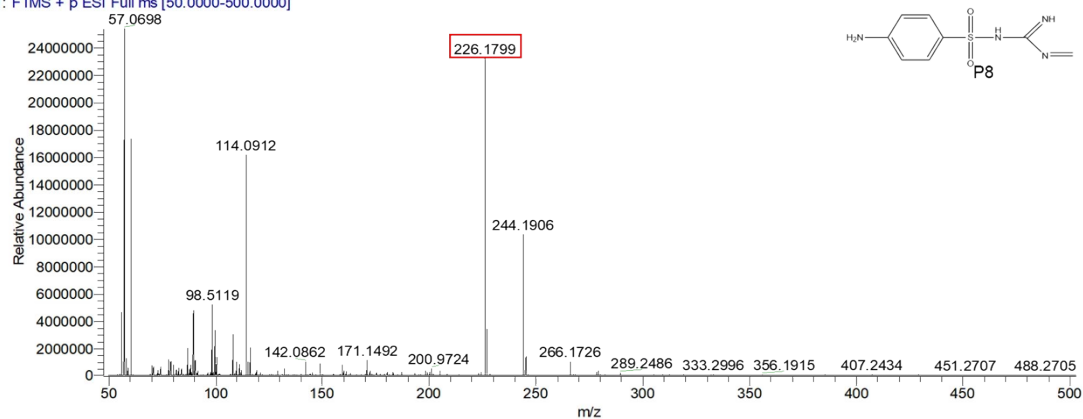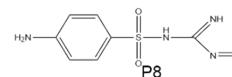

1 #5135 RT: 7.98 AV: 1 NL: 2.41E7  
T: FTMS + p ESI Full ms [50.0000-500.0000]

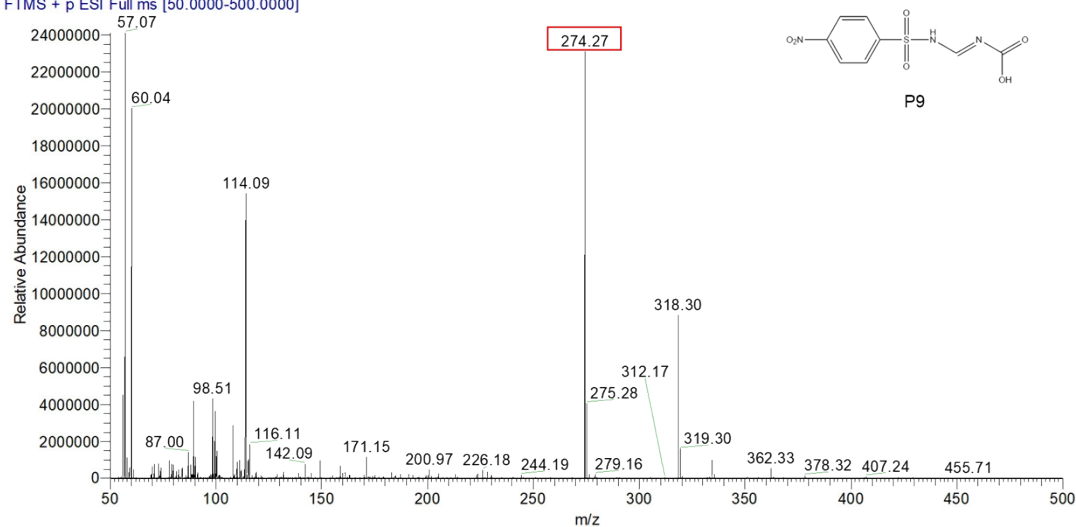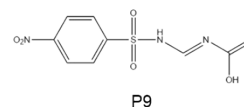

1 #5140 RT: 7.99 AV: 1 SB: 38 7.84-8.13 NL: 1.32E7  
T: FTMS + p ESI Full ms [50.0000-500.0000]

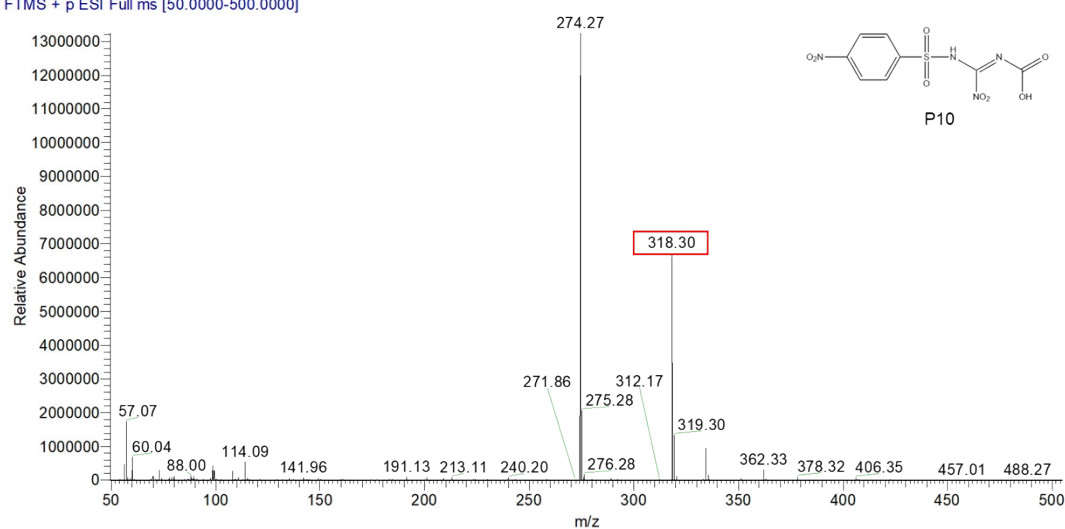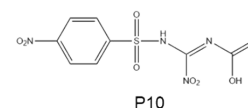

1 H. Zhao, L. Liu, B. Lu, M. Wu, H. Lu, J. Kang, J. Su, X. Jiang, Y. Wang, H. Miao, H. Zhu, Y. Dong and Y. Zhu,  
*Appl. Catal. B Environ. Energy*, 2025, **377**, 125498.
